# Supplementary material
Source: Springer Nature journal article supplement (https://www.springermedizin.de/resource/supplementary/13054_2010_8862_MOESM5_ESM.pdf/9732774)

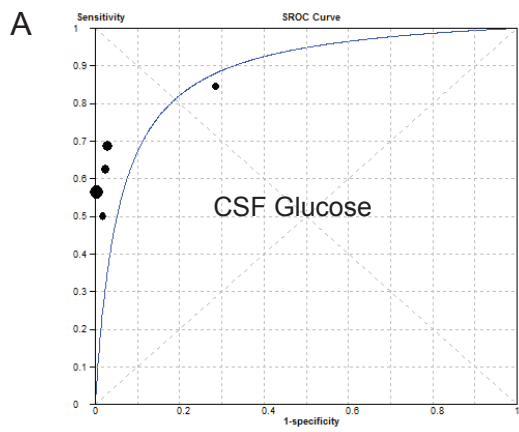

VS

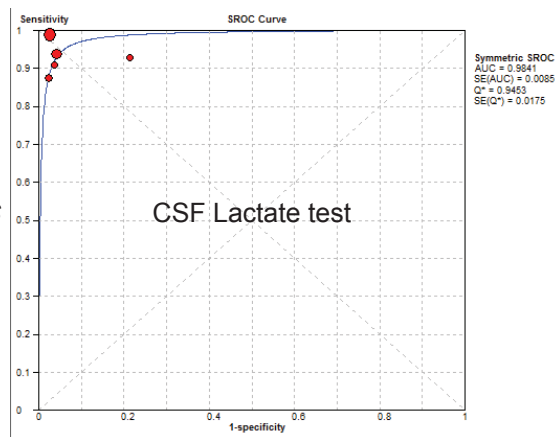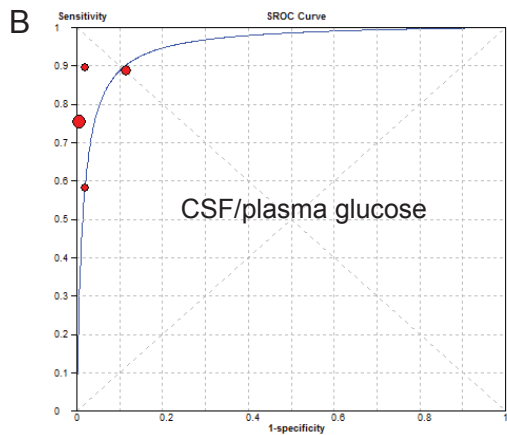

VS

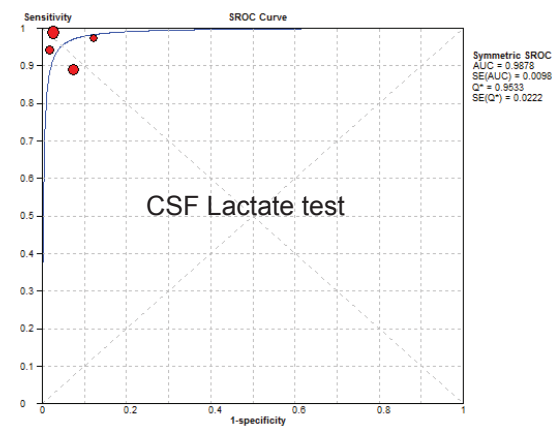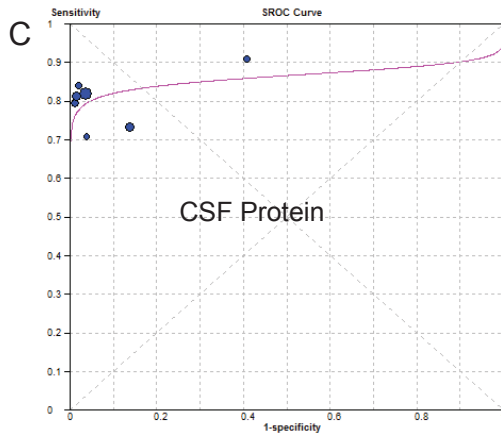

VS

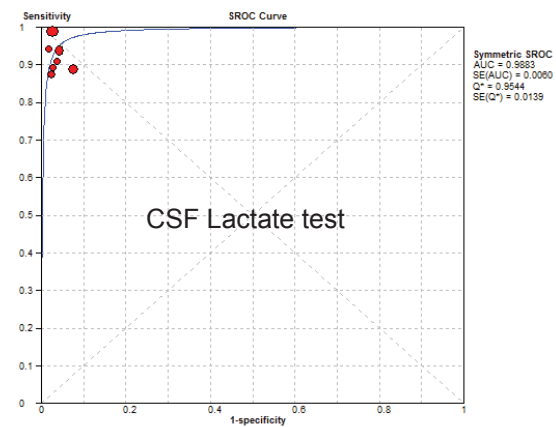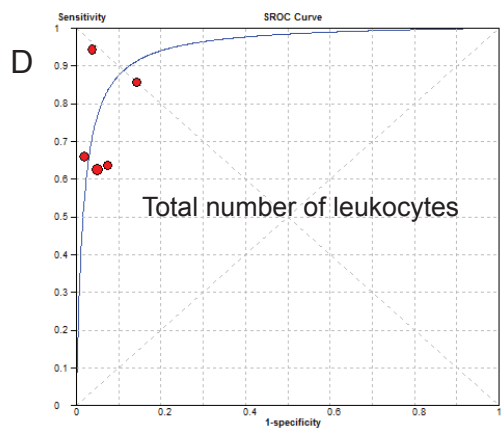

VS

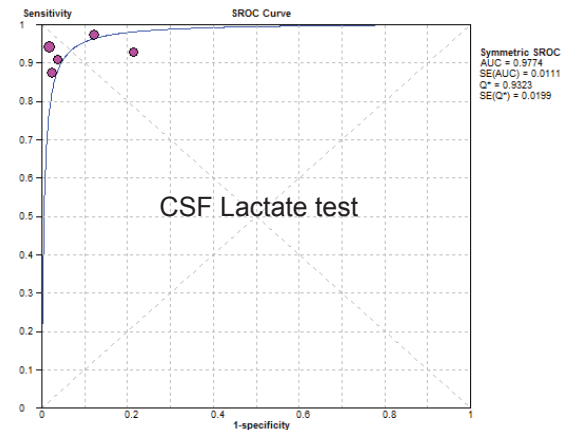

Supplement: MOESM5 [file 9732774]
